# Supplementary material for: Efficacy of titanium doped-indium tin oxide (Ti/TiO2–ITO) films in rapid oxygen generation under photocatalysis and their suitability for bio-medical application
Source: Royal Society of Chemistry journal article supplement (doi:10.1039/c4cp02819h), 2014-01-01
Supplement: c4cp02819h1.pdf [file c4cp02819h1.pdf]

## SUPPLEMENTARY INFORMATION

### **Efficacy of Titanium doped-Indium Tin Oxide (Ti/TiO<sub>2</sub>-ITO) Films in Rapid Oxygen Generation under Photocatalysis and their Suitability for Bio-medical Application**

A. Subrahmanyam,<sup>†</sup> Rajakumar Ananthakrishnan,<sup>‡,\*</sup> Md. Rakibuddin,<sup>‡</sup> T. Paul Ramesh,<sup>§</sup> M.  
Raveendra Kiran,<sup>⊥</sup> D. Shankari,<sup>†</sup> K. Chandrasekhar<sup>#</sup>

-----  
<sup>†</sup>Department of Physics, Indian Institute of Technology Madras, Chennai 600036, India.

<sup>‡,\*</sup> Department of Chemistry, Indian Institute of Technology Kharagpur, 721302, India.

<sup>§</sup>Apollo Hospital, Greams Road, Chennai 600006, India.

<sup>⊥</sup>National Institute of Technology, Suratkal, 575025 Karnataka, India.

<sup>#</sup>The National Institute of Engineering, Mysore, 570008, India.

\* Corresponding Author

*E-mail: raja.iitchem@yahoo.com*

## Preliminary Studies

Photocatalytic degradation of Rhodamine B was studied using the prepared ITO/TiO<sub>2</sub> catalysts under UV (254 nm) irradiation. The following are the experimental conditions and preliminary results obtained in the detailed study.

**Table S1. Experimental conditions**

| Parameters                                                  | Quantity                     | Remarks                                                                            |
|-------------------------------------------------------------|------------------------------|------------------------------------------------------------------------------------|
| Rhodamine B                                                 | 5 ppm                        | Catalyst 1                                                                         |
| Irradiation time                                            | 5 hrs                        | Cat 1 and Cat 2<br>UV source 6W 365 nm                                             |
| Variations done<br>Irradiation time<br>Concentration of dye | 0,1,2,3,4 and 5 hrs          | Kinetic studies                                                                    |
| Isopropanol                                                 | 1 % isopropanol (2-propanol) | To trap the hydroxyl radical( $\cdot$ OH) formed in the irradiated system [2,3, 4] |
| 1,4-benzoquinone                                            | 10 %, 20% and 30% variation  | For competitive inhibition of superoxide generated in the reaction medium [5]      |

## Photocatalytic Experiment

The photocatalytic efficiency of the prepared catalysts were determined using aqueous Rhodamine B Dye (of different concentrations) under the irradiations of 254 nm incident light. The dye concentration was taken as 5 ppm and the pH of the medium pH 6.5; the temperature is maintained at 300 K throughout the experiment. The degradation of the dye without the catalyst has been evaluated under nearly identical conditions. A 3.5 ml of the dye solution was taken in a quartz cuvettes and the catalyst was placed in the cuvette containing the dye solution and was irradiated perpendicularly to the surface of the films for the 5 hours under the UV light (6 watt) of wavelength 254 nm.

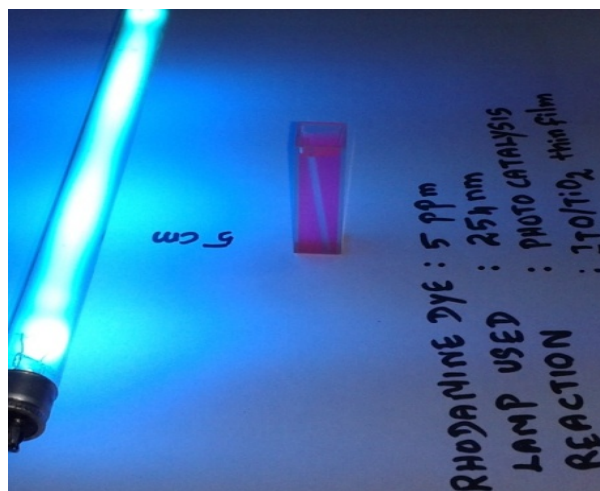

Photograph S1: The UV irradiation source and the dye solution with catalytic film  $C_1$  under photodegradation experiment.

### Photodegradation of Rhodamine B by ITO film C<sub>2</sub>

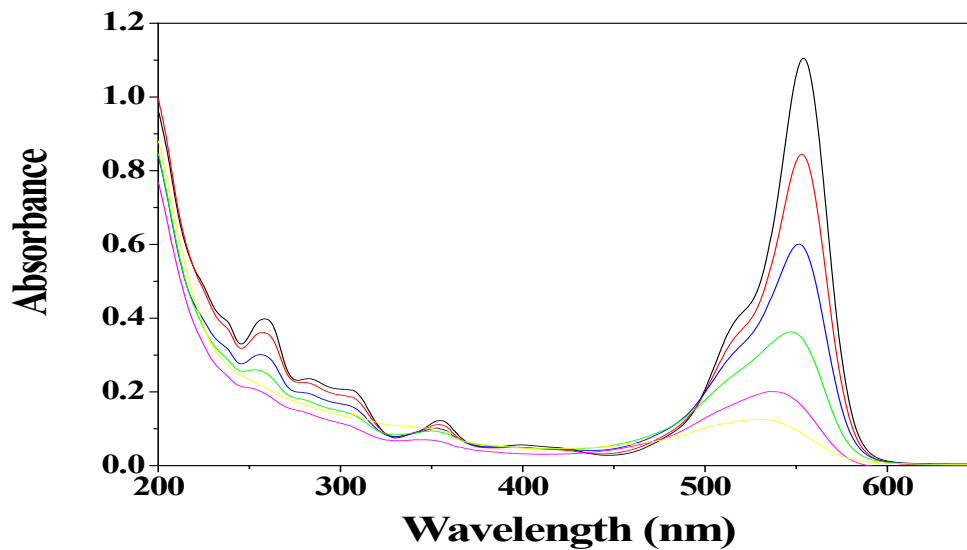

Fig. S1 Absorption spectrum of the photodegradation of Rhodamine B by ITO film C<sub>2</sub> under UV light (0 hr -black line, and 5 hrs- yellow line).

### Photodegradation of Rhodamine B by ITO film C<sub>3</sub>

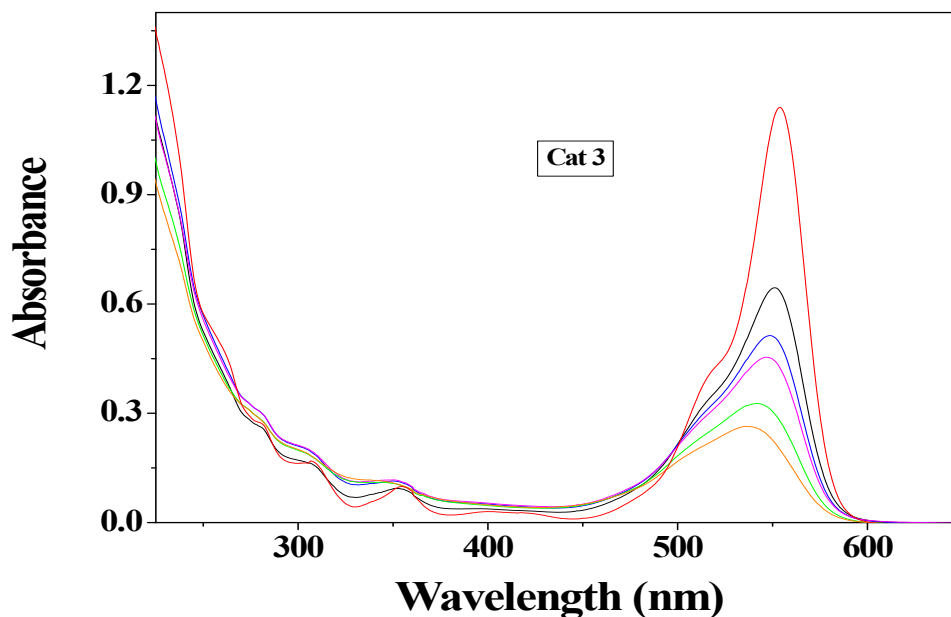

Fig. S2 Absorption spectrum of the photodegradation of Rhodamine B by ITO film C<sub>3</sub> under UV light (0 hr -red line, and 5 hrs- orange line).

### Photodegradation of Rhodamine B by ITO film C<sub>4</sub>

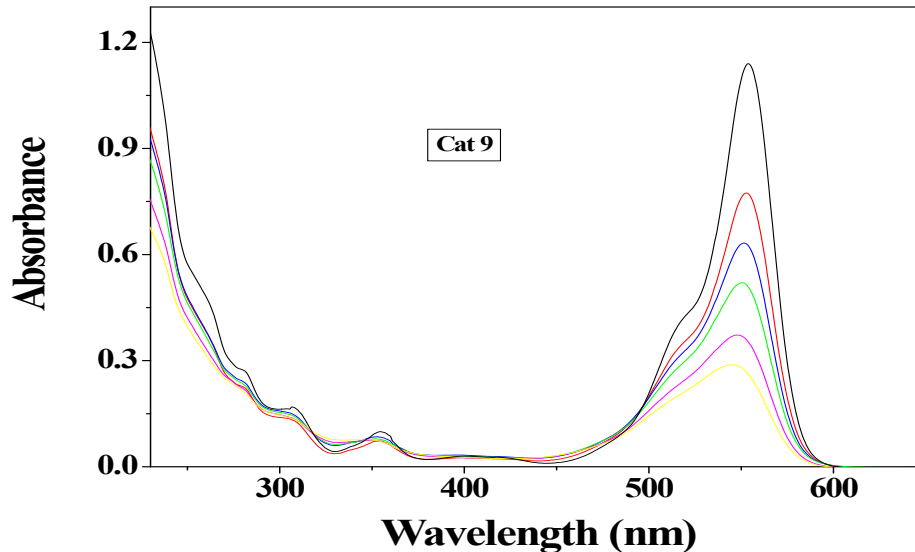

Fig. S3 Absorption spectrum of the photodegradation of Rhodamine B by ITO film C<sub>4</sub> under UV light (0 hr –black line, and 5 hrs- yellow line).

### Effect of Concentration on the photodegradation of the RhB by Ti/TiO<sub>2</sub>-ITO film C<sub>1</sub>

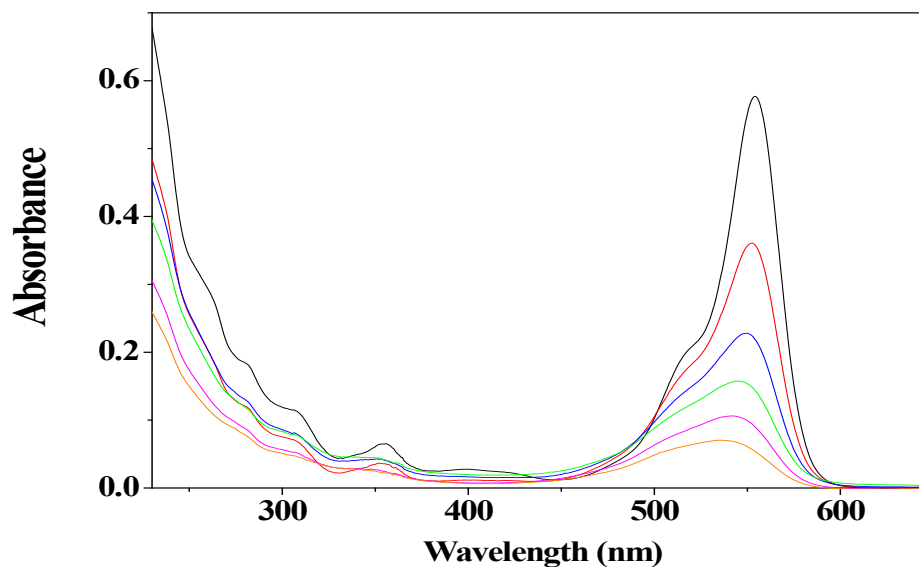

Fig. S4 Absorption spectra for the photodegradation of 2.5 ppm RhB by ITO film C<sub>1</sub> under various time (0 hr -black line, and 5 hrs- orange line).

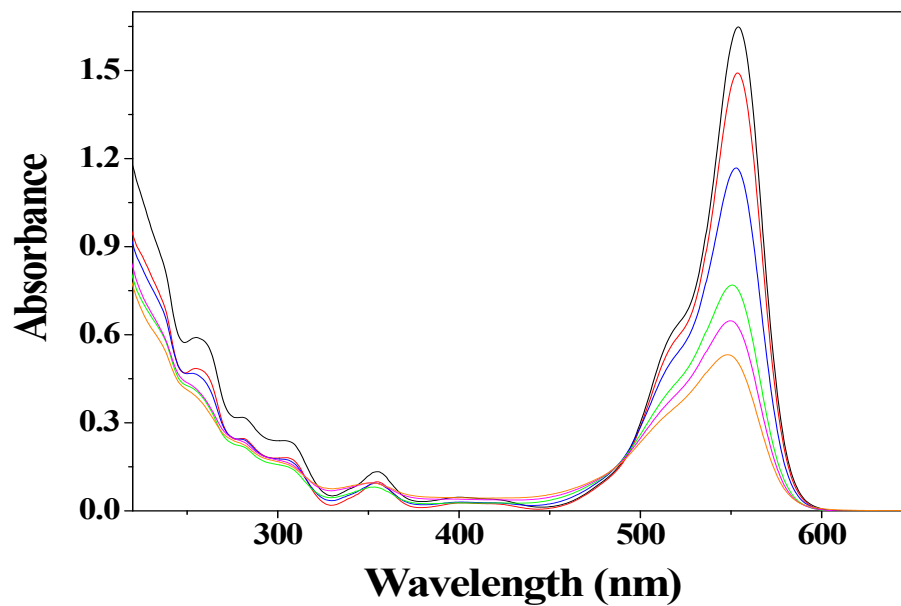

Fig. S5 Absorption spectra for the photodegradation of 7.5 ppm RhB by ITO film C<sub>1</sub> under various time (0 hr -black line, and 5 hrs- orange line).

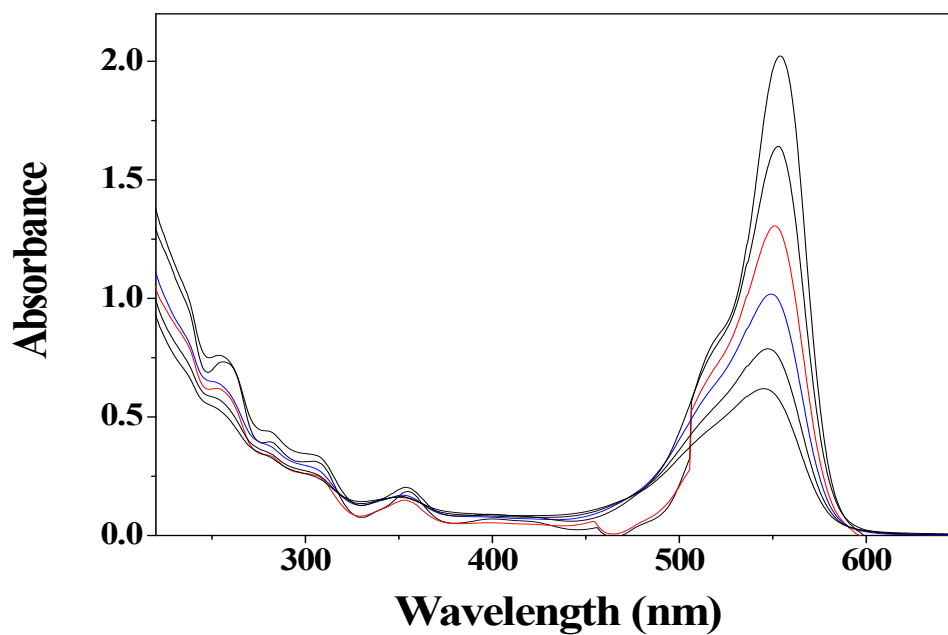

Fig. S6 Absorption spectra for the photodegradation of 10 ppm RhB by ITO film C<sub>1</sub> under various time (0 hr -black line, and 5 hrs- orange line).

## Photodegradation Kinetics of the RhB with different Ti/TiO<sub>2</sub>-ITO film catalysts

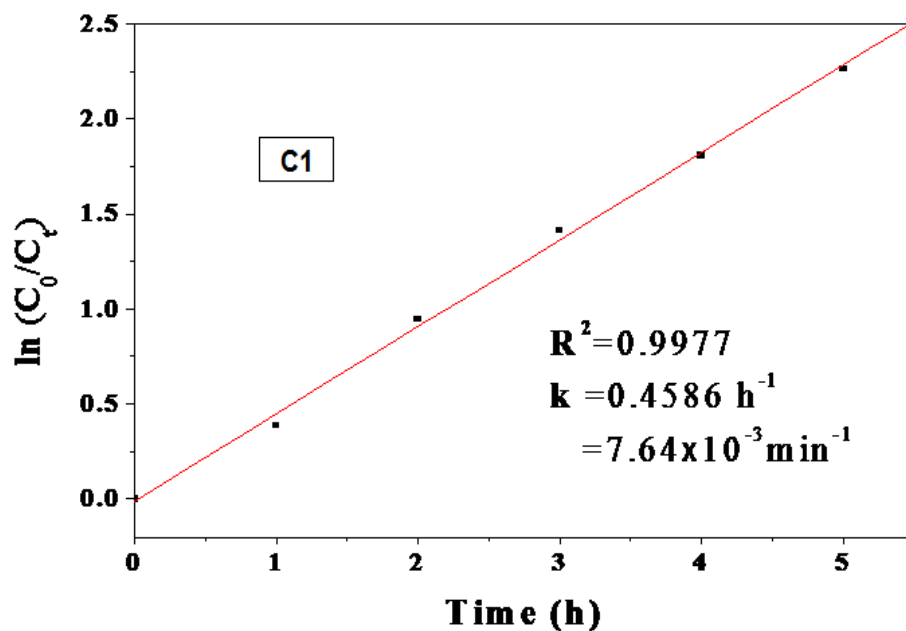

Fig. S7  $\ln(C_0/C_t)$  vs time plot of Rhodamine B degradation by ITO film C<sub>1</sub> (5 ppm, pH 6.5)

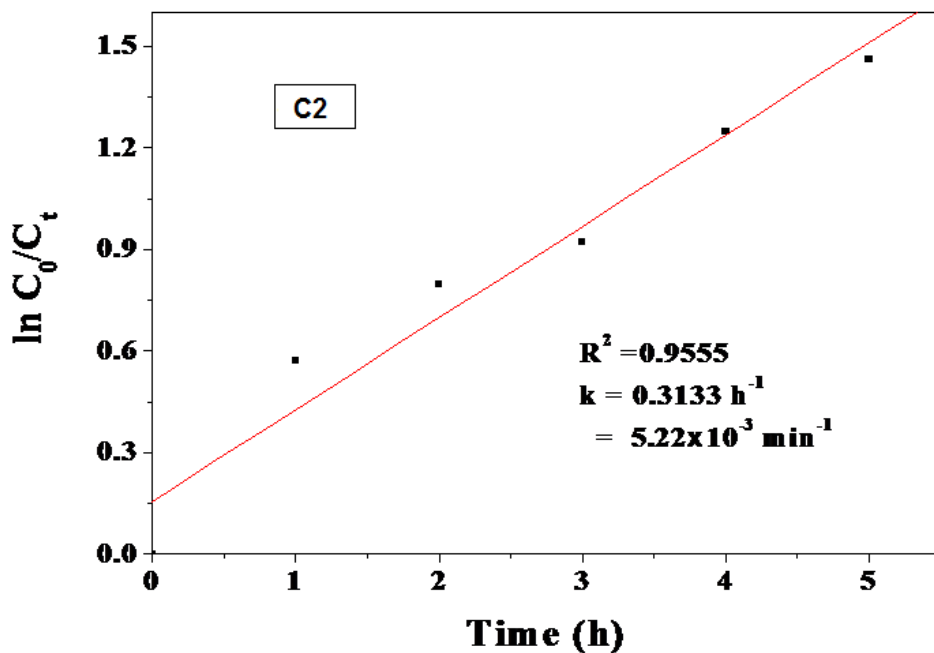

Fig. S8  $\ln(C_0/C_t)$  vs time plot of Rhodamine B degradation by ITO film C<sub>2</sub> (5 ppm, pH 6.5)

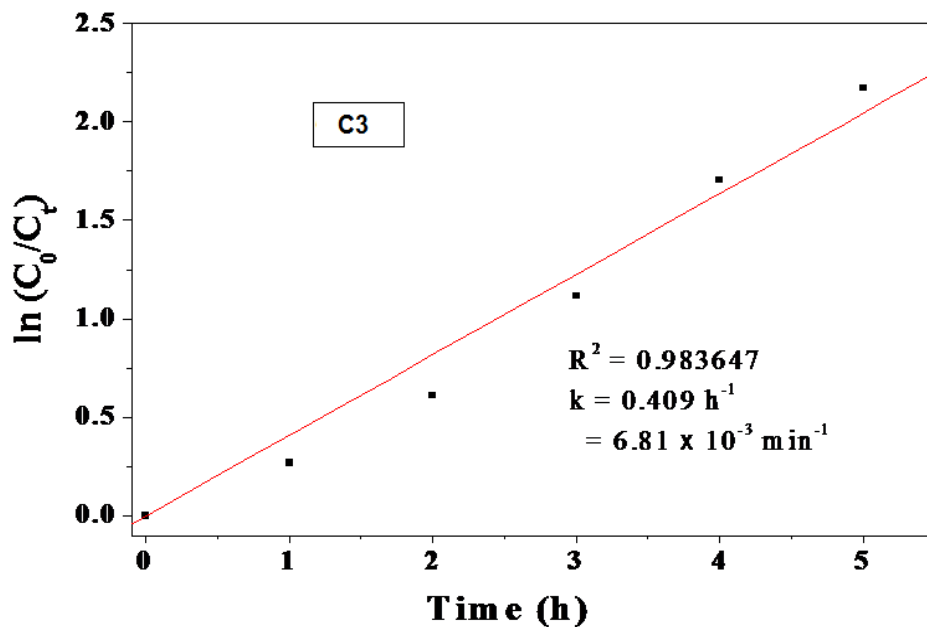

Fig. S9  $\ln(C_0/C_t)$  vs time plot of Rhodamine B degradation by ITO film C<sub>3</sub> (5 ppm, pH 6.5)

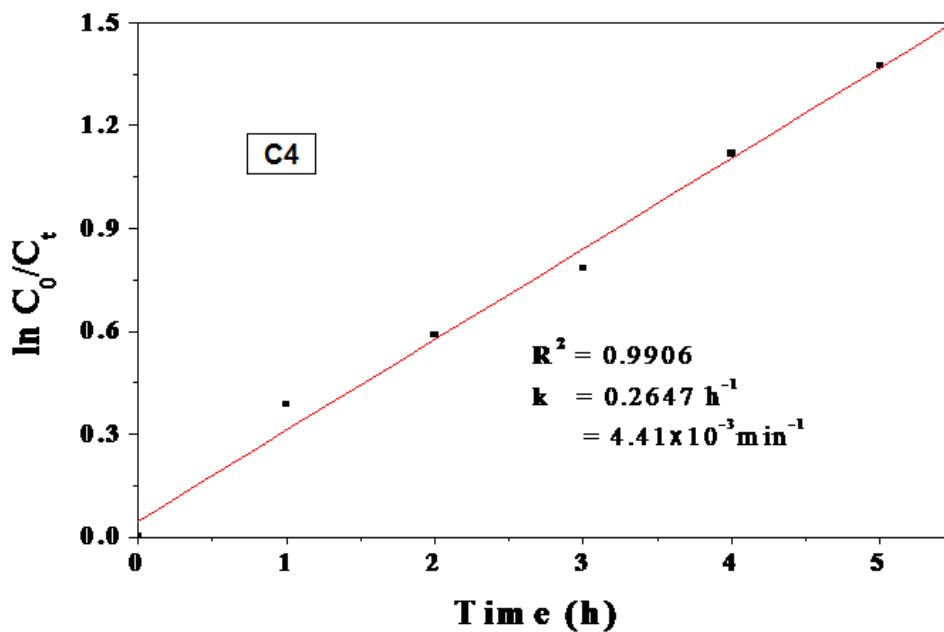

Fig. S10  $\ln(C_0/C_t)$  vs time plot of Rhodamine B degradation by ITO glass plate C<sub>4</sub> (5 ppm, pH 6.5).



### Photolysis of RhB in the absence of catalyst under UV and visible light (control studies)

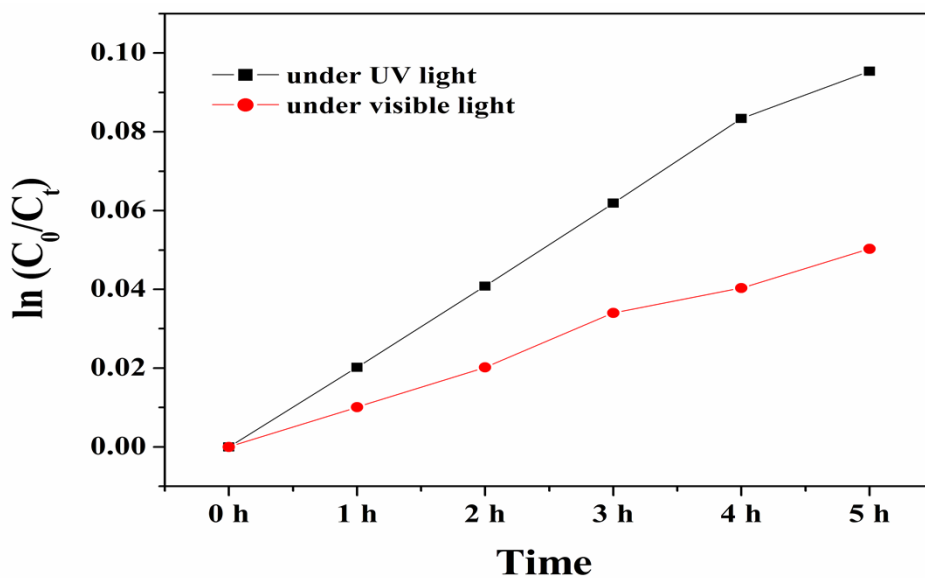

Fig. S11  $\ln(C_0/C_t)$  vs time plot of Rhodamine B (5 ppm, pH 6.5) degradation in absence of catalyst under UV and visible light.

### Determination of oxygen species in the photodegradation

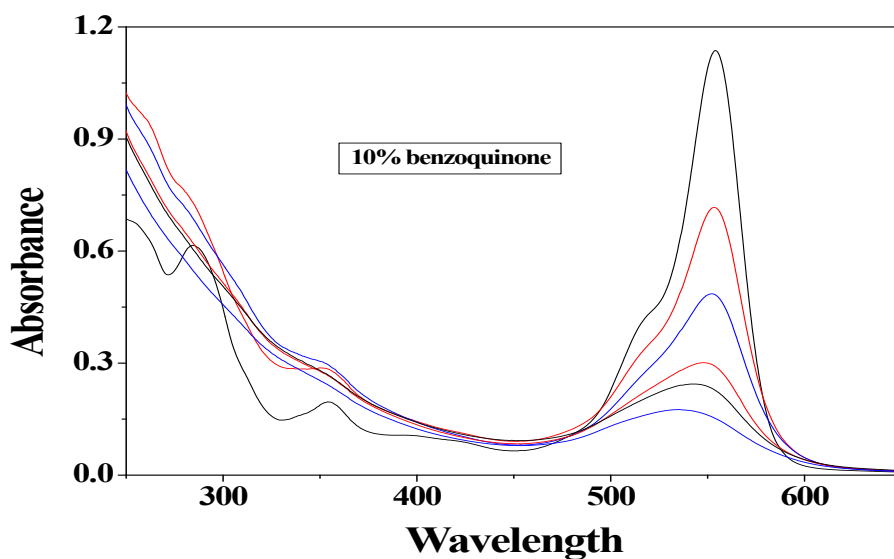

Fig. S12. Absorption spectra of Rhodamine B during photodegradation by ITO film  $C_1$  with 10% benzoquinone

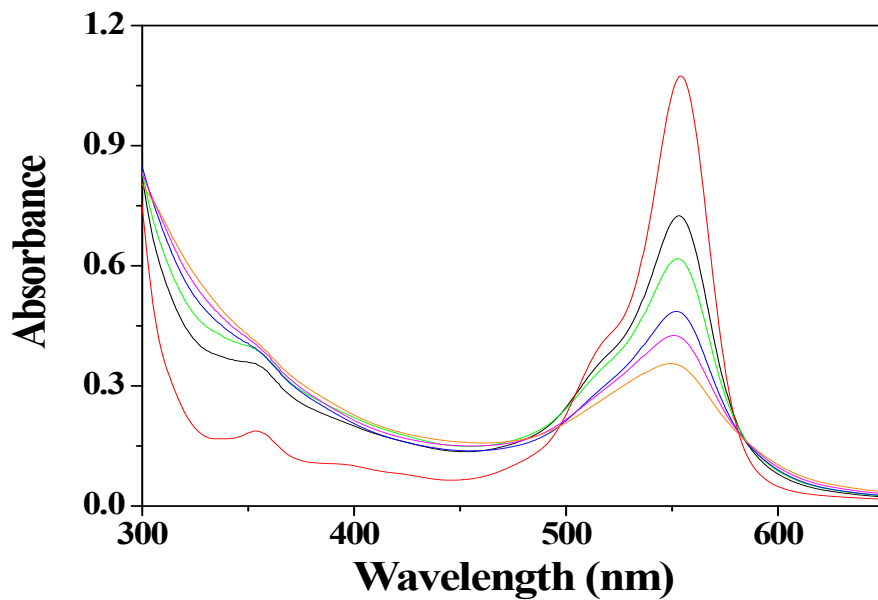

Fig. S13 Absorption spectra of Rhodamine B during photodegradation by ITO film C<sub>1</sub> with 20% benzoquinone

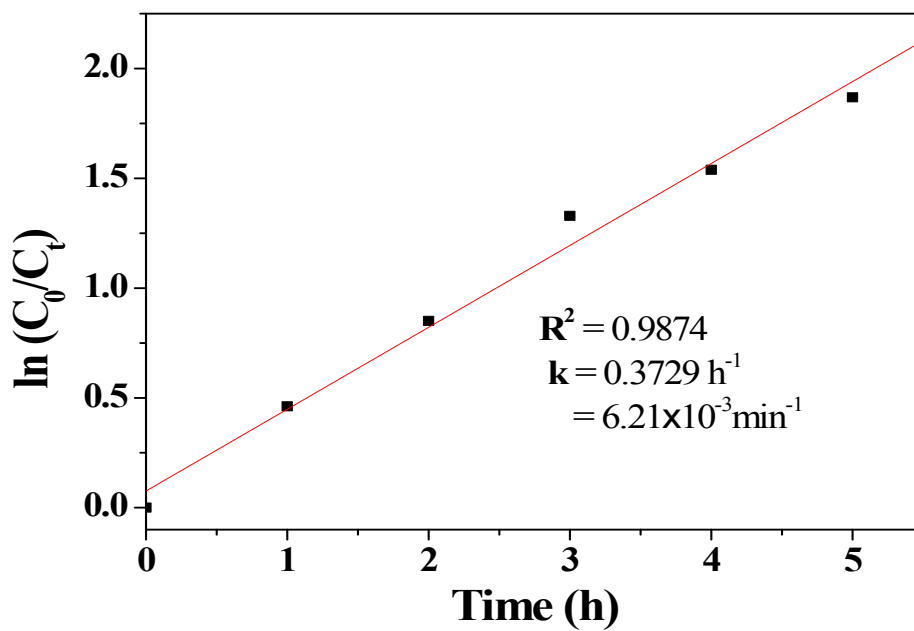

Fig. S14  $\ln(C_0/C_t)$  vs time plot of Rhodamine B (5 ppm, pH 6.5) degradation by ITO film C<sub>1</sub> with 10% benzoquinone

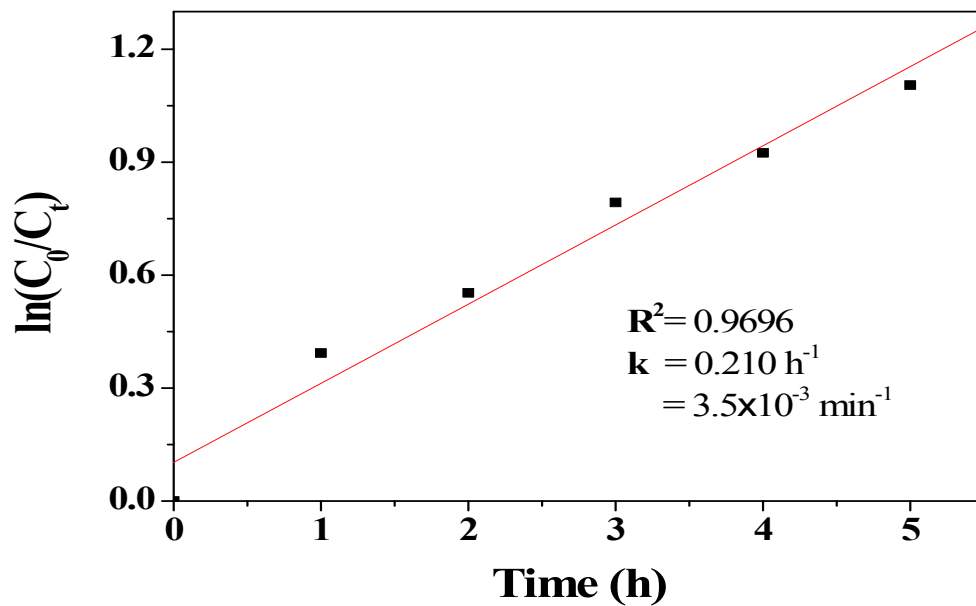

Fig. S15  $\ln(C_0/C_t)$  vs time plot of Rhodamine B (5 ppm, pH 6.5) degradation by ITO film  $C_1$  with 20% benzoquinone

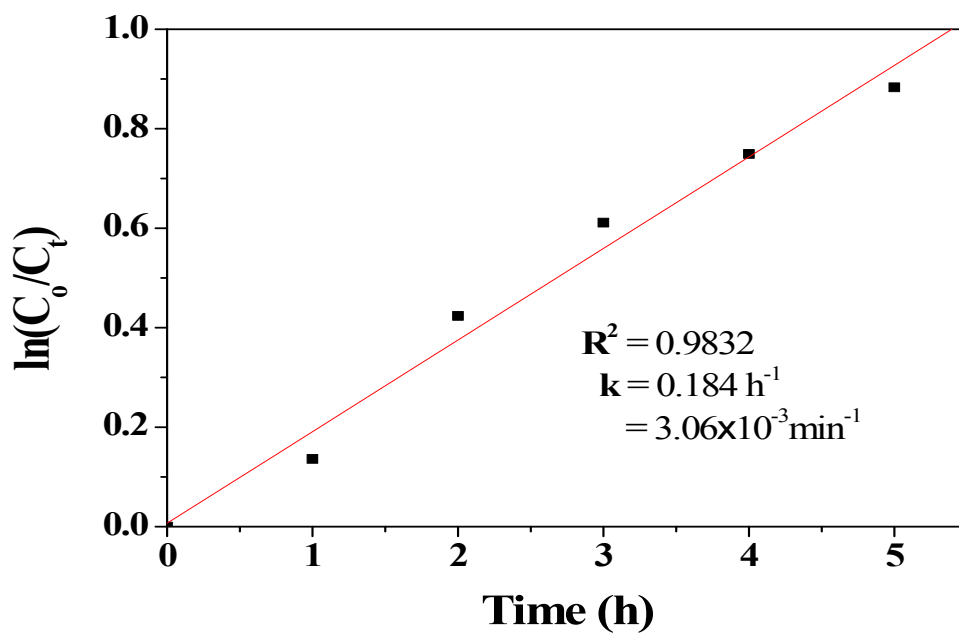

Fig. S16  $\ln(C_0/C_t)$  vs time plot of Rhodamine B (5 ppm, pH 6.5) degradation by ITO film  $C_1$  with 30% benzoquinone

## Effect of dissolved oxygen in the photodegradation of RhB

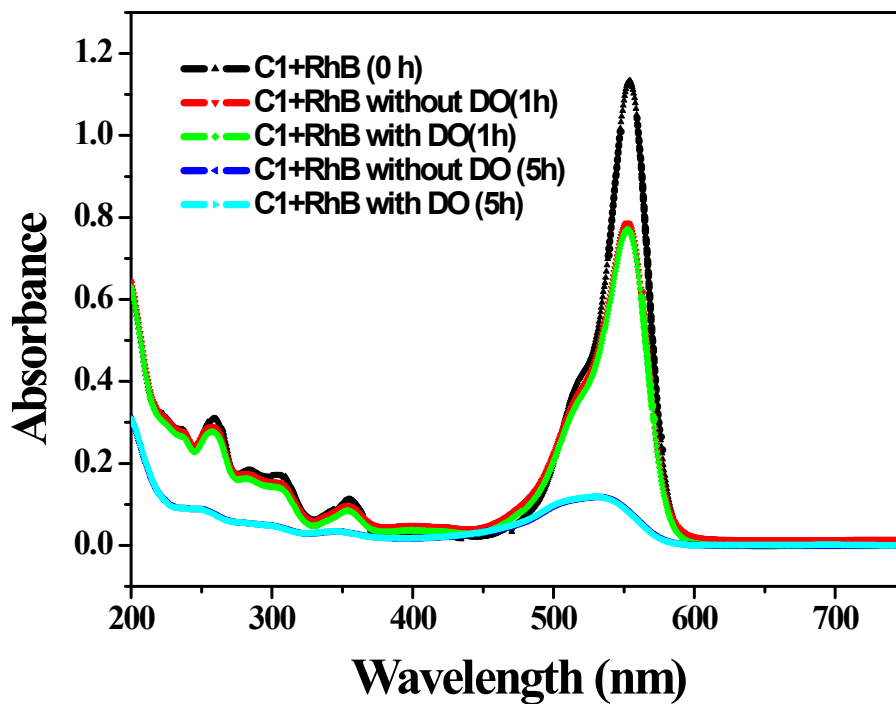

Fig. S17 Absorption spectrum for the effect of oxygen during photodegradation of Rhodamine B by ITO film C<sub>1</sub> under UV irradiation (periodically).

The results of important photocatalytic studies were presented inside the main manuscript and the details were discussed in brief.
